# Supplementary material
Source: Springer Nature journal article supplement (https://www.springermedizin.de/resource/supplementary/12890_2008_137_MOESM4_ESM.pdf/9506062)
Supplement: MOESM4 [file 9506062]

Table 4

|        | Quant RT-PCR |       | Array |      |
|--------|--------------|-------|-------|------|
|        | +/-          | -/-   | +/-   | -/-  |
| CebpB  | -2.6         | -4.4  | -1.5  | -1.5 |
| Il1b   | -2.5         | -4.4  | -3.4  | -3.3 |
| Kcne4  | -8.6         | -16.6 | -1.4  | -1.7 |
| Klf4   | -1.5         | -2.3  | -1.3  | -1.4 |
| Klf9   | -1.5         | -2.1  | -1.3  | -1.5 |
| Mmp9   | -9.6         | -16.9 | -2.5  | -2.6 |
| S100a8 | -22.7        | -10.9 | -5.7  | -4.2 |
